# Supplementary material for: Reaction mechanism conversion induced by the contest of nucleophile and leaving group
Source: Royal Society of Chemistry journal article supplement (doi:10.1039/d2cp01987f), 2022-01-01
Supplement: d2cp01987f2.pdf [file d2cp01987f2.pdf]

**Reaction Mechanism Conversion Induced by Contest of Nucleophile and  
Leaving Group**

Siwei Zhao,<sup>a</sup> Gang Fu,<sup>a</sup> Wenqing Zhen,<sup>a</sup> Li Yang,<sup>a,b,\*</sup> Jianmin Sun,<sup>a,c,\*</sup> and Jiayu  
Zhang<sup>a,b,\*</sup>

<sup>a</sup> MIIT Key Laboratory of Critical Materials Technology for New Energy  
Conversion and Storage, School of Chemistry and Chemical Engineering,

<sup>b</sup> State Key Lab of Advanced Welding and Joining,

<sup>c</sup> State Key Lab of Urban Water Resource and Environment,

Harbin Institute of Technology,

Harbin 150001, P. R. China

Author E-mail Address: yangli2014@hit.edu.cn, sunjm@hit.edu.cn, and

zhjx@hit.edu.cn

Table S1. Geometries of the OH<sup>-</sup> + CH<sub>3</sub>Cl stationary points.

|                                                | MP2   | B3LYP | M06   | B97-1 | BhandH | CCSD(T)-F12b <sup>a</sup> | Expt <sup>b</sup> |
|------------------------------------------------|-------|-------|-------|-------|--------|---------------------------|-------------------|
| OH <sup>-</sup>                                |       |       |       |       |        |                           |                   |
| R <sub>O-H1</sub>                              | 0.973 | 0.970 | 0.963 | 0.969 | 0.958  |                           |                   |
| CH <sub>3</sub> Cl                             |       |       |       |       |        |                           |                   |
| R <sub>C-Cl</sub>                              | 1.797 | 1.810 | 1.794 | 1.809 | 1.767  |                           | 1.785             |
| R <sub>C-H2</sub>                              | 1.096 | 1.094 | 1.094 | 1.095 | 1.090  |                           | 1.090             |
| θ <sub>H2-C-H3</sub>                           | 110.7 | 110.9 | 110.6 | 111.0 | 110.4  |                           | 110.8             |
| [HOH··CH <sub>2</sub> Cl] <sup>-</sup> (TS0)   |       |       |       |       |        |                           |                   |
| R <sub>C-Cl</sub>                              | 1.806 | 1.827 | 1.821 | 1.825 | 1.779  | 1.786                     |                   |
| R <sub>C-H2</sub>                              | 2.012 | 1.994 | 2.038 | 1.988 | 1.933  | 2.047                     |                   |
| θ <sub>C-H2-O</sub>                            | 167.0 | 173.5 | 164.5 | 171.2 | 163.3  | 163.7                     |                   |
| OH <sup>-</sup> ···HCH <sub>2</sub> Cl (im1)   |       |       |       |       |        |                           |                   |
| R <sub>C-H2</sub>                              | 1.124 | 1.141 | 1.149 | 1.152 | 1.161  | 1.126                     |                   |
| R <sub>C-Cl</sub>                              | 1.830 | 1.857 | 1.843 | 1.854 | 1.806  | 1.974                     |                   |
| R <sub>O-H2</sub>                              | 1.769 | 1.713 | 1.683 | 1.679 | 1.573  | 1.717                     |                   |
| R <sub>O-H1</sub>                              | 0.970 | 0.967 | 0.961 | 0.966 | 0.956  | 0.962                     |                   |
| R <sub>C-H3</sub>                              | 1.098 | 1.096 | 1.098 | 1.099 | 1.094  | 1.087                     |                   |
| θ <sub>H2-C-Cl</sub>                           | 110.5 | 111.6 | 111.6 | 111.3 | 110.4  | 109.6                     |                   |
| θ <sub>C-H2-O</sub>                            | 158.7 | 162.6 | 164.8 | 165.0 | 170.2  | 164.4                     |                   |
| θ <sub>H1-O-H2</sub>                           | 136.6 | 117.4 | 115.7 | 114.3 | 117.2  | 122.7                     |                   |
| [OH··HCH <sub>2</sub> ··Cl] <sup>-</sup> (TS1) |       |       |       |       |        |                           |                   |
| R <sub>C-H2</sub>                              | 1.094 | 1.094 | 1.100 | 1.096 | 1.090  | 1.084                     |                   |
| R <sub>C-Cl</sub>                              | 1.840 | 1.883 | 1.865 | 1.878 | 1.816  | 1.824                     |                   |
| R <sub>C-H3</sub>                              | 1.093 | 1.091 | 1.093 | 1.093 | 1.087  | 1.082                     |                   |
| R <sub>O-H2</sub>                              | 2.074 | 2.055 | 1.975 | 2.050 | 1.996  | 2.056                     |                   |
| R <sub>O-H1</sub>                              | 0.971 | 0.968 | 0.961 | 0.967 | 0.956  | 0.963                     |                   |
| θ <sub>H2-C-Cl</sub>                           | 110.5 | 111.2 | 112.9 | 111.5 | 111.4  | 110.9                     |                   |
| θ <sub>C-H2-O</sub>                            | 112.4 | 115.1 | 118.0 | 115.4 | 107.6  | 112.8                     |                   |

---

| $\text{OH}^- \cdots \text{CH}_3\text{Cl}$ (im1')                  |       |       |       |       |       |       |
|-------------------------------------------------------------------|-------|-------|-------|-------|-------|-------|
| $R_{\text{C-O}}$                                                  | 2.614 |       |       |       | 2.489 | 2.600 |
| $R_{\text{C-Cl}}$                                                 | 1.850 |       |       |       | 1.827 | 1.834 |
| $R_{\text{O-H1}}$                                                 | 0.971 |       |       |       | 0.956 | 0.963 |
| $R_{\text{C-H2}}$                                                 | 1.091 |       |       |       | 1.085 | 1.081 |
| $\theta_{\text{O-C-Cl}}$                                          | 169.3 |       |       |       | 168.6 | 168.6 |
| $\theta_{\text{C-O-H1}}$                                          | 158.5 |       |       |       | 152.5 | 154.6 |
| $[\text{OH} \cdots \text{CH}_3 \cdots \text{Cl}]^-$ (TS1')        |       |       |       |       |       |       |
| $R_{\text{C-O}}$                                                  | 2.237 |       |       |       | 2.212 | 2.227 |
| $R_{\text{O-H1}}$                                                 | 0.972 |       |       |       | 0.957 | 0.964 |
| $R_{\text{C-H3}}$                                                 | 1.084 |       |       |       | 1.079 | 1.072 |
| $R_{\text{C-Cl}}$                                                 | 2.056 |       |       |       | 1.998 | 2.053 |
| $\theta_{\text{C-O-H1}}$                                          | 110.1 |       |       |       | 112.8 | 107.8 |
| $\theta_{\text{H2-C-O}}$                                          | 76.6  |       |       |       | 75.2  | 77.1  |
| $\theta_{\text{H2-C-Cl}}$                                         | 99.7  |       |       |       | 101.4 | 99.8  |
| $\text{CH}_3\text{OH} \cdots \text{Cl}^-$ (im2)                   |       |       |       |       |       |       |
| $R_{\text{C-O}}$                                                  | 1.420 | 1.409 | 1.394 | 1.407 | 1.379 | 1.405 |
| $R_{\text{C-H2}}$                                                 | 1.103 | 1.103 | 1.103 | 1.104 | 1.099 | 1.094 |
| $R_{\text{O-H1}}$                                                 | 0.993 | 0.995 | 0.990 | 0.994 | 0.987 | 0.985 |
| $R_{\text{H1-Cl}}$                                                | 2.104 | 2.101 | 2.121 | 2.095 | 2.011 | 2.097 |
| $\theta_{\text{C-O-H1}}$                                          | 104.9 | 107.1 | 106.0 | 106.5 | 106.4 | 105.4 |
| $\theta_{\text{O-H1-Cl}}$                                         | 166.8 | 171.5 | 165.1 | 170.5 | 166.2 | 166.8 |
| $\theta_{\text{H3-C-O}}$                                          | 112.0 | 112.3 | 112.6 | 112.3 | 112.3 | 112.0 |
| $[\text{OH} \cdots \text{H} \cdots \text{CH}_2\text{Cl}]^-$ (TS2) |       |       |       |       |       |       |
| $R_{\text{O-H1}}$                                                 | 0.968 | 0.966 | 0.961 | 0.965 | 0.956 |       |
| $R_{\text{O-H2}}$                                                 | 1.152 | 1.203 | 1.303 | 1.219 | 1.218 |       |
| $R_{\text{C-H2}}$                                                 | 1.507 | 1.440 | 1.326 | 1.417 | 1.383 |       |
| $R_{\text{C-Cl}}$                                                 | 1.885 | 1.910 | 1.876 | 1.899 | 1.838 |       |
| $\theta_{\text{O-H2-C}}$                                          | 179.3 | 176.8 | 178.6 | 177.2 | 179.4 |       |

---

|                                                              |       |       |       |       |       |       |
|--------------------------------------------------------------|-------|-------|-------|-------|-------|-------|
| $\theta_{\text{H2-C-Cl}}$                                    | 107.8 | 111.1 | 108.9 | 110.6 | 108.9 |       |
| HOH $\cdots$ CH <sub>2</sub> Cl <sup>-</sup> (im3)           |       |       |       |       |       |       |
| R <sub>O-H1</sub>                                            | 0.967 | 0.964 | 0.960 | 0.964 | 0.955 |       |
| R <sub>O-H2</sub>                                            | 1.064 | 1.058 | 1.020 | 1.058 | 1.047 |       |
| R <sub>C-H2</sub>                                            | 1.691 | 1.718 | 1.837 | 1.707 | 1.675 |       |
| R <sub>C-Cl</sub>                                            | 1.904 | 1.946 | 1.939 | 1.934 | 1.869 |       |
| $\theta_{\text{O-H2-C}}$                                     | 174.9 | 178.1 | 168.3 | 177.2 | 171.8 |       |
| $\theta_{\text{H2-C-Cl}}$                                    | 104.1 | 108.9 | 98.6  | 107.8 | 102.0 |       |
| [OH $\cdots$ CH <sub>3</sub> $\cdots$ Cl] <sup>-</sup> (TS3) |       |       |       |       |       |       |
| R <sub>C-Cl</sub>                                            | 2.215 | 2.341 | 2.294 | 2.309 | 2.186 | 2.263 |
| R <sub>C-O</sub>                                             | 2.048 | 2.170 | 2.110 | 2.136 | 1.984 | 2.080 |
| R <sub>O-H1</sub>                                            | 0.976 | 0.972 | 0.966 | 0.971 | 0.961 | 0.968 |
| $\theta_{\text{O-C-Cl}}$                                     | 80.7  | 81.5  | 80.8  | 81.2  | 80.7  | 80.7  |
| $\theta_{\text{H1-O-C}}$                                     | 92.8  | 93.1  | 94.5  | 93.3  | 96.4  | 92.4  |
| CH <sub>3</sub> OH                                           |       |       |       |       |       |       |
| R <sub>C-O</sub>                                             | 1.435 | 1.427 | 1.410 | 1.424 | 1.394 | 1.425 |
| R <sub>C-H2</sub>                                            | 1.103 | 1.097 | 1.097 | 1.098 | 1.093 | 1.094 |
| R <sub>O-H1</sub>                                            | 0.966 | 0.964 | 0.961 | 0.963 | 0.954 | 0.945 |
| $\theta_{\text{C-O-H1}}$                                     | 107.9 | 108.9 | 109.1 | 108.5 | 109.8 | 108.5 |
| $\theta_{\text{H2-C-H3}}$                                    | 108.7 | 108.5 | 108.0 | 108.4 | 108.0 | 108.6 |
| H <sub>2</sub> O                                             |       |       |       |       |       |       |
| R <sub>O-H2</sub>                                            | 0.966 | 0.965 | 0.961 | 0.964 | 0.955 | 0.958 |
| $\theta_{\text{H1-O-H2}}$                                    | 103.9 | 104.7 | 104.7 | 104.4 | 105.6 | 104.5 |
| CH <sub>2</sub> Cl <sup>-</sup>                              |       |       |       |       |       |       |
| R <sub>C-H3</sub>                                            | 1.119 | 1.117 | 1.118 | 1.120 | 1.108 |       |
| R <sub>C-Cl</sub>                                            | 1.936 | 1.993 | 1.974 | 1.977 | 1.898 |       |
| $\theta_{\text{H3-C-Cl}}$                                    | 99.4  | 97.9  | 97.9  | 98.0  | 99.9  |       |

<sup>a</sup>The geometries of the stationary points at CCSD(T)-F12b/aug-cc-pVTZ level in ref 31; <sup>b</sup>The experimental geometries for reactants and products in ref 42; Bond lengths are

in angstroms (Å), and angles are in degree.

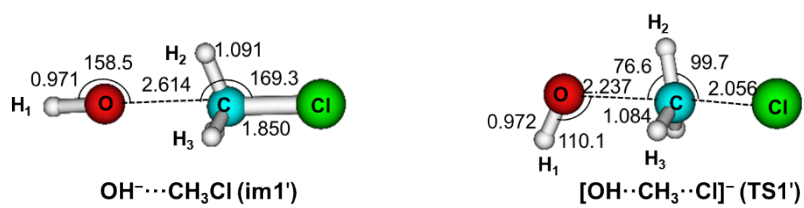

Figure S1. Structures of  $\text{OH}^- \cdots \text{CH}_3\text{Cl}$  (im1') and  $[\text{OH} \cdots \text{CH}_3 \cdots \text{Cl}]^-$  (TS1') for the  $\text{OH}^- + \text{CH}_3\text{Cl}$  reaction at MP2/aug-cc-pVDZ level.

Table S2. Average Fractions of  $\text{OH}^- + \text{CH}_3\text{Y} \rightarrow \text{CH}_3\text{OH} + \text{Y}^-$  Product Energy

Partitioning.

|                                                                                     | $f_{rot}'$      | $f_{vib}'$      | $f_{int}'$      | $f_{rel}'$      |
|-------------------------------------------------------------------------------------|-----------------|-----------------|-----------------|-----------------|
| $\text{OH}^- + \text{CH}_3\text{Cl} \rightarrow \text{CH}_3\text{OH} + \text{Cl}^-$ |                 |                 |                 |                 |
| Direct rebound                                                                      | $0.03 \pm 0.01$ | $0.62 \pm 0.02$ | $0.65 \pm 0.02$ | $0.35 \pm 0.02$ |
| Direct stripping                                                                    | $0.04 \pm 0.01$ | $0.69 \pm 0.04$ | $0.73 \pm 0.04$ | $0.27 \pm 0.04$ |
| Indirect                                                                            | $0.08 \pm 0.01$ | $0.78 \pm 0.01$ | $0.87 \pm 0.01$ | $0.13 \pm 0.01$ |
| Total                                                                               | $0.07 \pm 0.01$ | $0.74 \pm 0.01$ | $0.81 \pm 0.01$ | $0.19 \pm 0.01$ |
| $^a\text{OH}^- + \text{CH}_3\text{I} \rightarrow \text{CH}_3\text{OH} + \text{I}^-$ |                 |                 |                 |                 |
| Direct rebound                                                                      | $0.16 \pm 0.01$ | $0.63 \pm 0.01$ | $0.79 \pm 0.01$ | $0.21 \pm 0.01$ |
| Direct stripping                                                                    | $0.07 \pm 0.01$ | $0.66 \pm 0.01$ | $0.73 \pm 0.01$ | $0.27 \pm 0.01$ |
| Indirect                                                                            | $0.09 \pm 0.01$ | $0.77 \pm 0.01$ | $0.86 \pm 0.01$ | $0.14 \pm 0.01$ |
| Total                                                                               | $0.10 \pm 0.01$ | $0.70 \pm 0.01$ | $0.80 \pm 0.01$ | $0.20 \pm 0.01$ |

<sup>a</sup> the fractions of the product energy partitioning for the  $\text{OH}^- + \text{CH}_3\text{I}$  reaction in ref 9;

Table S3. The reaction probabilities and rate constant for the  $\text{OH}^- + \text{CH}_3\text{Y}$  ( $\text{Y} = \text{Cl}, \text{I}$ )

Reaction Pathways.

| reaction probability                         | systems                              |                                                |
|----------------------------------------------|--------------------------------------|------------------------------------------------|
|                                              | $\text{OH}^- + \text{CH}_3\text{Cl}$ | $\text{OH}^- + \text{CH}_3\text{I}^{\text{a}}$ |
| total reaction                               | $0.35 \pm 0.03$                      | $0.42 \pm 0.03$                                |
| $\text{CH}_3\text{OH} + \text{Y}^-$          | $0.35 \pm 0.03$                      | $0.23 \pm 0.02$                                |
| $\text{CH}_2\text{Y}^- + \text{H}_2\text{O}$ | —                                    | $0.18 \pm 0.02$                                |
| $[\text{CH}_3\text{--Y--OH}]^-$              | —                                    | $0.01 \pm 0.01$                                |
| rate constant <sup>b, c</sup>                | $(1.3\text{-}1.6) \times 10^{-9}$    | $1.7 \times 10^{-9}$                           |

<sup>a</sup> The reaction probability for the  $\text{OH}^- + \text{CH}_3\text{I}$  reaction at the B97-1/ECP/d level of theory at  $E_{\text{coll}} = 0.04$  eV reported in ref 10. <sup>b, c</sup> The experimental rate constant ( $\text{cm}^3 \cdot \text{mol}^{-1} \cdot \text{s}^{-1}$ ) for the  $\text{OH}^- + \text{CH}_3\text{Cl}$  and  $\text{OH}^- + \text{CH}_3\text{I}$  reactions reported in ref 20, 22, 25 and 10, respectively.

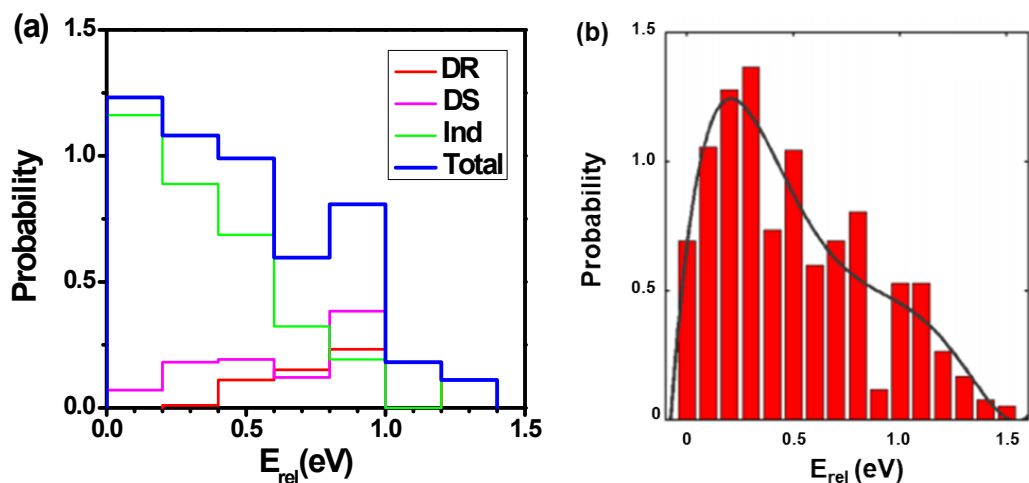

Figure S2. (a) the product relative translational energy distributions for the  $\text{OH}^- + \text{CH}_3\text{Cl}$  reaction at the B3LYP/aug-cc-pVDZ level of theory at  $E_{coll} = 0.04$  eV. Results are presented for the direct rebound (red), the direct stripping (purple), and the indirect (green) atomic-level mechanisms, as well as for the total reaction (blue); (b) the product relative translational energy distributions for the  $\text{OH}^- + \text{CH}_3\text{I}$  reaction at the B97-1/ECP/d level of theory at  $E_{coll} = 0.05$  eV reported in ref 9.



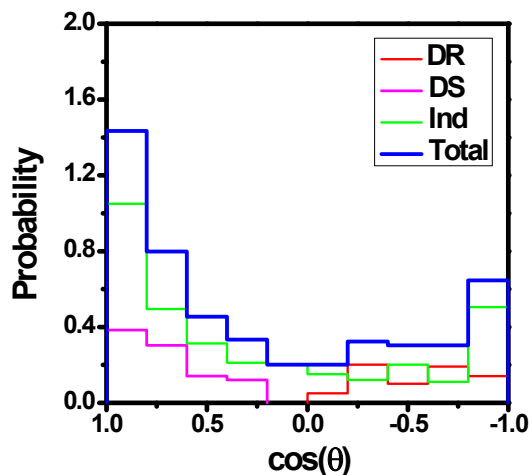

Figure S3. Histogram of the velocity scattering angle distribution for the  $\text{OH}^- + \text{CH}_3\text{Cl}$  reaction at the B3LYP/aug-cc-pVDZ level of theory. Results are presented for the direct rebound (red), the direct stripping (purple), and the indirect (green) atomic-level mechanisms, as well as for the total scattering (blue).

Supplementary movies:

Representative trajectories of (1) DR mechanism, (2) DS mechanism, (3) Ind-pre mechanism, (4) Ind-pre+PE mechanism, (5) Ind-pre+PE+BR mechanism, as well as (6) Ind-pre+post mechanism, and (7) Ind-pre+post+PE mechanism at  $E_{coll} = 0.89$  kcal mol<sup>-1</sup> for the  $\text{OH}^- + \text{CH}_3\text{Cl}$  reaction.
